# Supplementary material
Source: MDPI journal article supplement (https://www.mdpi.com/2075-163X/11/12/1396)
Supplement: s1 [file s1]

**Table S1** Major and trace constituents of all kidney stones and the details of corresponding patient's (gender and age).

| No | Gender | Age | Ca<br>% | Mg<br>µg/g | Na<br>µg/g | K<br>µg/g | Fe<br>µg/g | Cu<br>µg/g | Zn<br>µg/g | Ba<br>µg/g | Ti<br>ng/g | Cr<br>ng/g | Mo<br>ng/g | Cd<br>ng/g | Pb<br>µg/g |
|----|--------|-----|---------|------------|------------|-----------|------------|------------|------------|------------|------------|------------|------------|------------|------------|
| 1  | Male   | 61  | 0.3     | 481.2      | 813.2      | 351.7     | 3.3        | 5.75       | 2.3        | 0.04       | 0.0        | 0.0        | 143.5      | 9.5        | 0.00       |
| 2  | Male   | 70  | 25.8    | 345.0      | 990.4      | 167.2     | 10.8       | 0.35       | 29.7       | 1.71       | 0.0        | 0.0        | 195.5      | 262.8      | 0.65       |
| 3  | Female | 34  | 25.6    | 363.1      | 1436.1     | 64.0      | 4.5        | 0.45       | 25.8       | 0.51       | 184.6      | 0.0        | 269.5      | 154.8      | 0.68       |
| 4  | Male   | 41  | 25.1    | 336.2      | 1078.8     | 224.6     | 8.9        | 0.81       | 38.2       | 0.34       | 68.4       | 66.7       | 248.9      | 142.5      | 1.05       |
| 5  | Male   | 67  | 28.3    | 1788.7     | 3819.3     | 295.6     | 20.2       | 0.45       | 873.1      | 15.35      | 723.4      | 317.6      | 1264.5     | 413.8      | 10.16      |
| 6  | Female | 27  | 28.1    | 4469.2     | 4765.7     | 830.2     | 12.6       | 0.32       | 771.3      | 3.70       | 845.1      | 0.0        | 597.7      | 490.9      | 13.53      |
| 7  | Female | 64  | 26.3    | 258.9      | 862.1      | 222.1     | 4.4        | 0.39       | 23.3       | 0.12       | 17.5       | 0.0        | 371.3      | 137.4      | 1.05       |
| 8  | Female | 60  | 25.0    | 355.2      | 1440.4     | 199.8     | 7.9        | 0.68       | 23.4       | 0.31       | 38.9       | 34.6       | 419.2      | 176.8      | 3.43       |
| 9  | Male   | 68  | 27.3    | 1209.1     | 2544.6     | 180.9     | 17.3       | 0.41       | 222.2      | 1.32       | 358.3      | 0.0        | 373.8      | 405.0      | 8.33       |
| 10 | Female | 51  | 30.5    | 1856.6     | 5048.3     | 397.6     | 36.0       | 0.35       | 1009.0     | 3.06       | 275.7      | 0.0        | 797.8      | 268.4      | 10.31      |
| 11 | Male   | 57  | 28.1    | 3403.2     | 5664.9     | 221.1     | 30.9       | 1.00       | 1150.9     | 4.79       | 831.7      | 215.1      | 613.8      | 937.2      | 15.59      |
| 12 | Male   | 39  | 8.4     | 53.1       | 655.8      | 202.2     | 6.0        | 2.29       | 8.0        | 0.12       | 0.0        | 0.0        | 170.8      | 92.7       | 0.06       |
| 13 | Male   | 64  | 25.8    | 450.4      | 1290.3     | 403.1     | 8.0        | 0.36       | 25.2       | 0.79       | 0.0        | 0.0        | 193.1      | 460.3      | 1.18       |
| 14 | Male   | 59  | 7.5     | 48.4       | 1205.5     | 281.6     | 16.3       | 2.25       | 5.2        | 0.06       | 0.0        | 1043.4     | 297.6      | 40.3       | 0.22       |
| 15 | Male   | 64  | 25.2    | 48.2       | 1655.4     | 768.6     | 79.3       | 0.53       | 22.4       | 0.25       | 55.0       | 0.0        | 300.0      | 350.0      | 0.00       |
| 16 | Male   | 22  | 27.4    | 1634.4     | 2599.7     | 21.9      | 10.9       | 0.20       | 379.2      | 1.86       | 400.0      | 0.0        | 416.7      | 21.1       | 3.46       |
| 17 | Male   | 46  | 26.2    | 818.1      | 4265.3     | 88.8      | 27.1       | 1.22       | 478.7      | 1.52       | 336.7      | 189.3      | 501.3      | 116.9      | 18.37      |
| 18 | Male   | 38  | 26.3    | 588.2      | 2282.8     | 222.4     | 15.2       | 0.65       | 117.0      | 0.77       | 70.2       | 0.0        | 296.2      | 157.0      | 6.15       |
| 19 | Male   | 41  | 28.9    | 2235.7     | 4667.8     | 206.8     | 57.2       | 0.24       | 837.4      | 2.85       | 957.3      | 0.0        | 728.6      | 816.6      | 20.42      |
| 20 | Male   | 35  | 26.8    | 266.5      | 578.1      | 397.9     | 10.3       | 0.49       | 13.5       | 0.53       | 0.0        | 0.0        | 282.8      | 100.0      | 0.84       |
| 21 | Female | 61  | 26.5    | 1131.9     | 3607.1     | 185.8     | 15.8       | 0.40       | 262.6      | 4.38       | 429.0      | 0.0        | 388.7      | 750.5      | 24.05      |
| 22 | Male   | 56  | 25.8    | 229.3      | 1054.4     | 141.4     | 9.8        | 0.59       | 56.2       | 0.18       | 111.1      | 0.0        | 359.1      | 83.3       | 1.70       |
| 23 | Male   | 71  | 24.9    | 256.2      | 612.1      | 527.0     | 47.6       | 0.45       | 28.9       | 0.41       | 0.0        | 0.0        | 494.1      | 158.8      | 0.00       |

| No | Gender | Age | Ca<br>% | Mg<br>µg/g | Na<br>µg/g | K<br>µg/g | Fe<br>µg/g | Cu<br>µg/g | Zn<br>µg/g | Ba<br>µg/g | Ti<br>ng/g | Cr<br>ng/g | Mo<br>ng/g | Cd<br>ng/g | Pb<br>µg/g |
|----|--------|-----|---------|------------|------------|-----------|------------|------------|------------|------------|------------|------------|------------|------------|------------|
| 24 | Male   | 40  | 25.5    | 268.2      | 915.1      | 510.9     | 13.9       | 0.28       | 41.3       | 0.20       | 20.7       | 0.0        | 279.8      | 111.4      | 0.15       |
| 25 | Male   | 45  | 23.6    | 228.8      | 985.3      | 134.9     | 27.0       | 0.48       | 23.0       | 0.57       | 15.2       | 0.0        | 293.2      | 98.0       | 1.07       |
| 26 | Male   | 61  | 26.1    | 198.3      | 772.6      | 465.7     | 12.2       | 0.30       | 12.5       | 0.30       | 3.7        | 61.6       | 597.0      | 391.8      | 1.04       |
| 27 | Male   | 83  | 26.8    | 1164.0     | 2016.0     | 362.3     | 10.2       | 0.66       | 760.3      | 4.29       | 219.9      | 0.0        | 744.7      | 780.1      | 2.68       |
| 28 | Female | 45  | 28.0    | 2167.4     | 2766.1     | 168.5     | 5.2        | 0.13       | 390.6      | 1.86       | 681.5      | 0.0        | 407.4      | 477.8      | 4.55       |
| 29 | Female | 69  | 27.2    | 1401.8     | 2923.4     | 256.6     | 14.8       | 0.31       | 822.4      | 1.61       | 513.9      | 0.0        | 557.3      | 379.9      | 8.68       |
| 30 | Male   | 52  | 25.7    | 238.3      | 477.4      | 268.2     | 14.7       | 0.47       | 36.2       | 0.46       | 0.0        | 0.0        | 369.8      | 494.1      | 2.07       |
| 31 | Male   | 30  | 22.0    | 98.2       | 50.5       | 302.8     | 5.2        | 0.34       | 26.4       | 0.26       | 183.2      | 0.0        | 68.1       | 41.9       | 10.25      |
| 32 | Female | 24  | 30.7    | 3568.5     | 6685.1     | 1697.6    | 15.3       | 0.13       | 578.0      | 8.12       | 1576.9     | 0.0        | 1043.3     | 566.3      | 12.59      |
| 33 | Female | 67  | 9.0     | 55480.8    | 4417.0     | 2576.3    | 1.8        | 0.51       | 466.1      | 15.41      | 969.6      | 0.0        | 93.2       | 96.9       | 1.63       |
| 34 | Male   | 40  | 28.4    | 3919.7     | 2381.0     | 2380.9    | 0.0        | 0.00       | 205.6      | 1.19       | 0.0        | 0.0        | 166.7      | 142.9      | 0.00       |
| 35 | Female | 50  | 14.8    | 40219.1    | 6010.6     | 915.6     | 30.8       | 0.13       | 461.2      | 4.91       | 1283.8     | 2883.1     | 376.0      | 80.3       | 0.64       |
| 36 | Female | 38  | 28.7    | 5192.6     | 3571.4     | 1870.4    | 0.0        | 0.00       | 622.4      | 1.14       | 0.0        | 0.0        | 535.7      | 285.7      | 0.00       |
| 37 | Female | 27  | 27.4    | 1086.1     | 1227.4     | 406.1     | 14.2       | 0.44       | 324.8      | 1.30       | 740.9      | 0.0        | 642.3      | 102.2      | 7.05       |
| 38 | Male   | 34  | 25.2    | 135.1      | 1405.7     | 410.3     | 18.6       | 0.17       | 56.9       | 0.37       | 0.0        | 0.0        | 112.5      | 137.5      | 2.48       |
| 39 | Female | 58  | 20.5    | 1401.2     | 1905.3     | 347.5     | 14.8       | 0.12       | 543.7      | 2.30       | 502.6      | 0.0        | 280.2      | 434.4      | 8.95       |
| 40 | Male   | 31  | 27.3    | 2753.5     | 2237.4     | 299.2     | 17.2       | 0.28       | 485.1      | 2.24       | 1450.0     | 0.0        | 515.8      | 205.3      | 4.82       |
| 41 | Female | 73  | 31.1    | 2072.4     | 2650.3     | 609.8     | 7.8        | 0.31       | 635.3      | 5.59       | 862.3      | 0.0        | 1108.7     | 992.8      | 6.27       |
| 42 | Male   | 53  | 25.5    | 1935.4     | 3251.6     | 304.3     | 10.8       | 0.30       | 508.1      | 1.85       | 1625.9     | 39.6       | 243.8      | 407.6      | 3.74       |
| 43 | Male   | 39  | 28.0    | 1297.5     | 2711.4     | 294.5     | 25.9       | 0.55       | 620.2      | 9.53       | 502.7      | 0.0        | 827.9      | 532.8      | 10.67      |
| 44 | Male   | 59  | 9.4     | 63.4       | 737.2      | 263.3     | 17.7       | 1.72       | 7.3        | 0.12       | 0.0        | 26.7       | 273.4      | 58.4       | 0.30       |
| 45 | Male   | 46  | 25.3    | 455.2      | 3225.3     | 173.8     | 21.1       | 1.84       | 234.5      | 0.96       | 393.8      | 0.0        | 973.4      | 584.3      | 11.06      |
| 46 | Female | 57  | 27.4    | 1978.0     | 2607.5     | 438.1     | 9.7        | 0.34       | 721.3      | 2.44       | 728.4      | 0.0        | 500.0      | 290.1      | 12.58      |
| 47 | Male   | 68  | 0.3     | 8.1        | 108.8      | 221.3     | 5.5        | 1.94       | 1.4        | 0.08       | 5.3        | 85.3       | 85.5       | 11.4       | 0.00       |

| No | Gender | Age | Ca<br>% | Mg<br>µg/g | Na<br>µg/g | K<br>µg/g | Fe<br>µg/g | Cu<br>µg/g | Zn<br>µg/g | Ba<br>µg/g | Ti<br>ng/g | Cr<br>ng/g | Mo<br>ng/g | Cd<br>ng/g | Pb<br>µg/g |
|----|--------|-----|---------|------------|------------|-----------|------------|------------|------------|------------|------------|------------|------------|------------|------------|
| 48 | Male   | 79  | 27.7    | 1809.9     | 3559.6     | 576.2     | 62.4       | 0.07       | 758.5      | 3.35       | 1173.4     | 0.0        | 1391.1     | 1100.8     | 7.26       |
| 49 | Male   | 41  | 27.5    | 13499.9    | 8966.4     | 946.3     | 54.9       | 0.17       | 2678.0     | 13.54      | 1781.4     | 0.0        | 390.1      | 1524.9     | 25.78      |
| 50 | Male   | 20  | 28.8    | 3183.3     | 4534.6     | 1092.1    | 19.6       | 5.51       | 1196.5     | 3.14       | 989.4      | 0.0        | 676.1      | 433.1      | 9.17       |
| 51 | Male   | 44  | 26.1    | 235.1      | 604.1      | 388.8     | 12.4       | 0.72       | 20.8       | 0.23       | 204.5      | 0.0        | 513.7      | 58.4       | 2.75       |
| 52 | Male   | 58  | 13.5    | 95.4       | 254.5      | 335.5     | 6.0        | 1.19       | 30.6       | 0.48       | 135.9      | 0.0        | 228.1      | 145.2      | 0.22       |
| 53 | Male   | 40  | 26.0    | 573.1      | 1194.6     | 217.7     | 23.0       | 0.08       | 232.5      | 1.85       | 87.3       | 0.0        | 234.9      | 84.3       | 8.29       |
| 54 | Male   | 45  | 26.9    | 178.3      | 1020.4     | 727.4     | 15.8       | 0.49       | 25.3       | 0.33       | 0.0        | 0.0        | 357.1      | 71.4       | 2.29       |
| 55 | Male   | 34  | 24.5    | 495.1      | 29.9       | 434.5     | 8.2        | 0.11       | 161.1      | 1.39       | 92.7       | 0.0        | 141.5      | 22.0       | 2.19       |
| 56 | Male   | 36  | 24.2    | 307.4      | 1259.5     | 725.5     | 191.4      | 0.43       | 79.7       | 0.42       | 0.0        | 3597.4     | 651.3      | 161.5      | 2.31       |
| 57 | Female | 46  | 26.0    | 306.7      | 1113.8     | 430.4     | 10.6       | 0.57       | 84.7       | 0.37       | 69.0       | 0.0        | 381.2      | 172.4      | 3.57       |
| 58 | Male   | 72  | 25.8    | 433.2      | 1379.9     | 306.4     | 3.0        | 0.56       | 34.5       | 0.19       | 16.1       | 0.0        | 730.6      | 80.6       | 0.75       |
| 59 | Male   | 52  | 29.1    | 133.6      | 1020.4     | 868.3     | 10.3       | 0.00       | 115.2      | 0.50       | 0.0        | 0.0        | 255.1      | 40.8       | 0.00       |
| 60 | Male   | 38  | 54.4    | 2181.4     | 16666.7    | 25475.6   | 0.0        | 0.00       | 271.2      | 3.67       | 0.0        | 0.0        | 333.3      | 166.7      | 0.00       |
| 61 | Male   | 38  | 27.9    | 1190.6     | 2043.1     | 354.3     | 18.3       | 0.11       | 423.6      | 1.58       | 367.3      | 4247.4     | 494.9      | 584.2      | 12.07      |
| 62 | Male   | 35  | 24.6    | 296.2      | 425.0      | 132.4     | 271.0      | 4.46       | 365.1      | 12.81      | 202.8      | 0.0        | 111.3      | 82.5       | 2.68       |
| 63 | Female | 48  | 32.3    | 420.7      | 2777.8     | 1606.9    | 2.5        | 0.00       | 465.2      | 4.44       | 20694.4    | 0.0        | 222.2      | 277.8      | 0.00       |
| 64 | Female | 66  | 25.4    | 128.3      | 980.4      | 818.1     | 23.6       | 0.45       | 19.9       | 0.29       | 343.1      | 0.0        | 264.7      | 98.0       | 0.00       |
| 65 | Male   | 45  | 27.3    | 1595.9     | 2807.9     | 197.1     | 19.5       | 1.92       | 842.1      | 1.89       | 265.6      | 0.0        | 593.8      | 468.8      | 14.02      |
| 66 | Male   | 42  | 23.7    | 404.5      | 1158.4     | 165.1     | 8.8        | 0.85       | 24.0       | 0.49       | 35.6       | 0.0        | 514.4      | 150.0      | 1.03       |

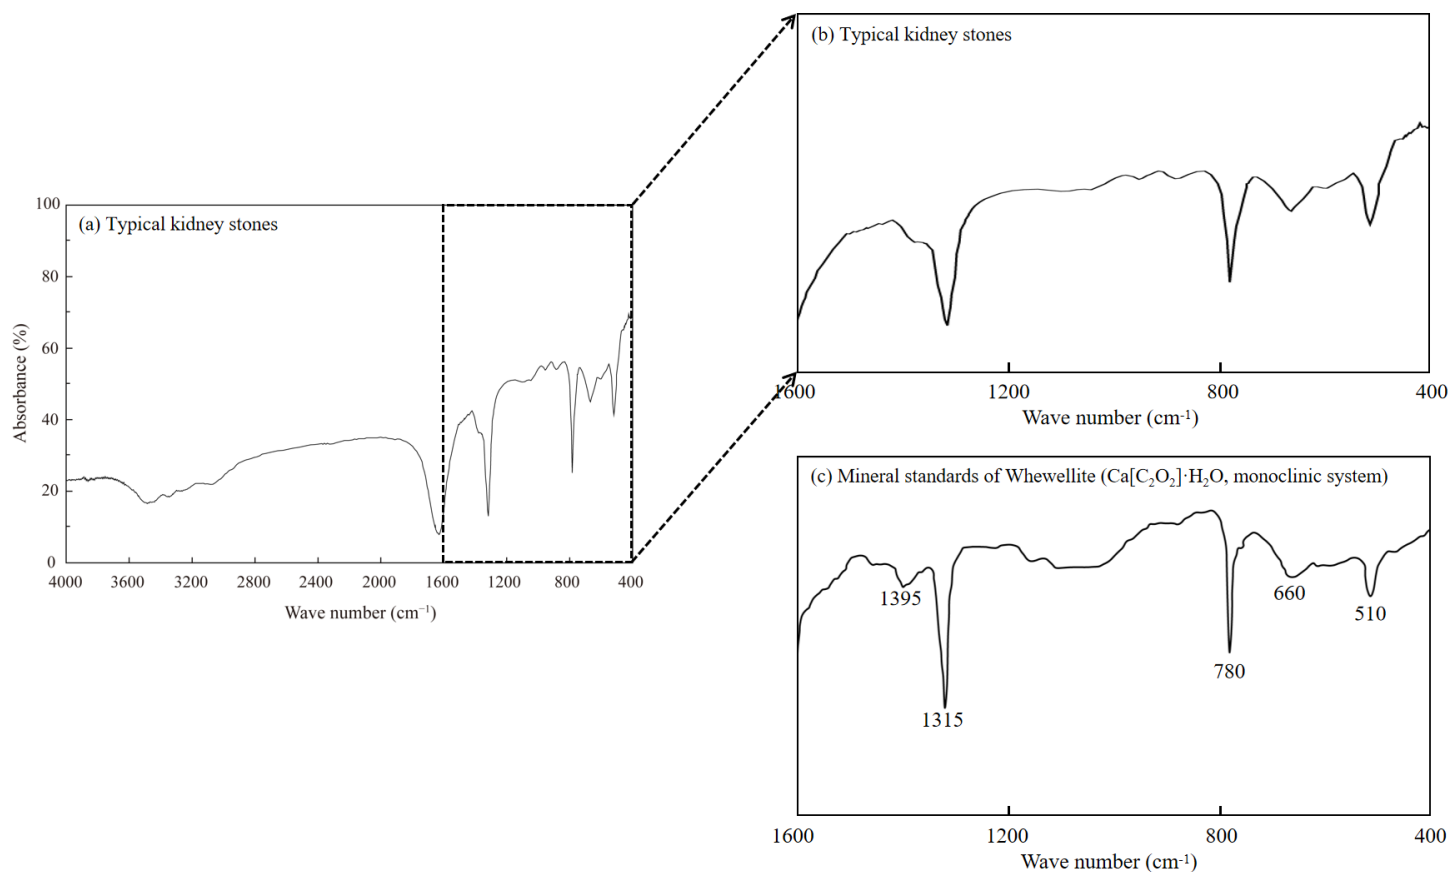

**Figure S1.** The comparison of infrared spectrum of (a, b) typical kidney stones and (c) mineral standards of Whewellite (Calcium oxalate monohydrate,  $\text{Ca}[\text{C}_2\text{O}_2]\cdot\text{H}_2\text{O}$ , monoclinic system). As shown in (c), the sharp absorption bands were observed at  $1315\text{ cm}^{-1}$ ,  $780\text{ cm}^{-1}$ ,  $510\text{ cm}^{-1}$  and the relatively weak absorption bands were observed at  $1395\text{ cm}^{-1}$ ,  $660\text{ cm}^{-1}$  (Mineral Infrared Spectrum Atlas, 1982, Science Press: Beijing). The similar sharp absorption bands and the relatively weak absorption bands were also found in the typical kidney stones sample in (b), which characterize the mineralogical compositions of sample. For example, C-O stretching attributes to the band at  $\sim 1315\text{ cm}^{-1}$ , the bands at  $\sim 780$  and  $\sim 660\text{ cm}^{-1}$  were the result of C-H bending together with the out of plane O-H bending.

**Text S1.** The information of instrument and the parameters of infrared spectroscopy analysis system (LIIR-20, Lambda scientific, China)

Spectrum range:  $4000\text{ cm}^{-1}$  to  $400\text{ cm}^{-1}$

Resolution:  $1.5\text{ cm}^{-1}$

Transmittancy repeatability:  $<0.5\%$

Signal to noise ratio:  $>15000$

Baseline straightness:  $\pm 1\%$

Detector: Deuterium triglyceride sulfate crystal (DTGS)

Light source: Infrared light supply
